# Supplementary material for: The influences of ambient humidity on laser-induced breakdown spectroscopy
Source: Royal Society of Chemistry journal article supplement (doi:10.1039/d3ja00233k), 2023-01-01
Supplement: d3ja00233k1.pdf [file d3ja00233k1.pdf]

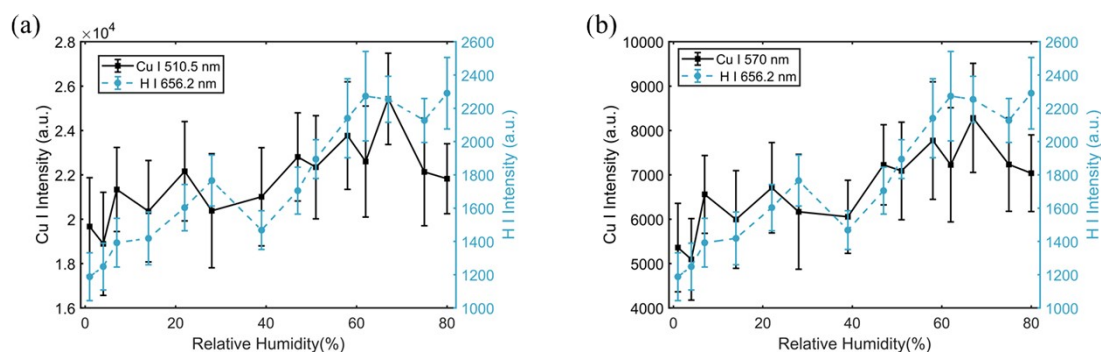

**Fig. S1** Variation of spectral intensity with relative humidity. Lateral light collection with laser energy 30 mJ. The black lines in (a), (b) are the intensities of Cu I 510.55 and 570.02 nm, respectively, and the blue line is the intensity of H I 656.28 nm. The collecting path was along G3-F3-L2 as in Fig. 1.

**Table S1** Variation of intensity of Cu I 510.55 nm and H I 656.27 nm with relative humidity. Laser energy was 30 mJ. Emission was collected from different angles.

| Collecting angle                             | Energy (mJ) | Intensity of Cu I 510.55 nm (a.u.) |                 |                                                | Intensity of H I 656.27 nm (a.u.) |              |                                       |
|----------------------------------------------|-------------|------------------------------------|-----------------|------------------------------------------------|-----------------------------------|--------------|---------------------------------------|
|                                              |             | $I_{RH_L}^{Cu}$                    | $I_{RH_H}^{Cu}$ | $R^{Cu} = \frac{I_{RH_H}^{Cu}}{I_{RH_L}^{Cu}}$ | $I_{RH_L}^H$                      | $I_{RH_H}^H$ | $R^H = \frac{I_{RH_H}^H}{I_{RH_L}^H}$ |
| Horizontal (Fig. S1)                         |             | 20067                              | 22995           | 1.15                                           | 1308                              | 2255         | 1.72                                  |
| 70 degree with the horizontal plane (Fig. 1) | 30          | 8603                               | 10623           | 1.23                                           | 6567                              | 10768        | 1.64                                  |
